# Supplementary material for: Benchmarking Community-Wide Estimates of Growth Potential from Metagenomes Using Codon Usage Statistics
Source: PubMed Central journal article supplement (PMC9600850; doi:10.1128/msystems.00745-22), 2022-10-03
Supplement: msystems.00745-22-s0001.pdf [file msystems.00745-22-s0001.pdf]

| Model         | CUB Metrics        | Other Variables               | CUB Calculated at the Single-Gene Level |
|---------------|--------------------|-------------------------------|-----------------------------------------|
| MMBC*         | $\Delta$ MILC      | GC, OGT                       | Y                                       |
| MMv1*         | MILC <sub>HE</sub> | OGT                           | N                                       |
| growthpred    | $\Delta$ ENC', S   | OGT                           | Y                                       |
| gRodon "full" | MILC <sub>HE</sub> | $\Psi$ , Codon Pair Bias, OGT | N                                       |
